# Supplementary material
Source: PubMed Central journal article supplement (PMC9352413)
Supplement: mmc2.pdf [file mmc2.pdf]

**Supplementary table 1. Studies assessing the performance of serum and bronchoalveolar fluid galactomannan for the diagnosis of IPA in critically ill patients with existing definitions as reference**

| Diagnostic performance of serum GM |                                                                         |                                                                                                      |               |                 |                 |               |          |                  |          |                                                        |
|------------------------------------|-------------------------------------------------------------------------|------------------------------------------------------------------------------------------------------|---------------|-----------------|-----------------|---------------|----------|------------------|----------|--------------------------------------------------------|
| Study                              | Design                                                                  | Type of IPA #                                                                                        | Sensitivity % | Specificity %   | PPV %           | NPV %         | LR+      | LR-              | DOR      | Population                                             |
| GM cut-off                         | Timeline                                                                | IPA prevalence ##                                                                                    | (95% CI)      | (95% CI)        | (95% CI)        | (95% CI)      | (95% CI) | (95% CI)         | (95% CI) |                                                        |
|                                    | Reference                                                               | N/total (%)                                                                                          |               |                 |                 |               |          |                  |          |                                                        |
| Janssen et al.,<br>2021* [1]       | Observational<br>Prospective<br>ECMM/ISHAM<br>criteria for<br>CAPA [2]  | Proven/probable/possible CAPA<br>Discovery cohort<br>42/279 (15)<br>Validation cohort<br>21/209 (10) |               |                 |                 |               |          |                  |          | ICU patients with COVID-19                             |
| 0.5 OD<br>(Discovery cohort)       |                                                                         |                                                                                                      | 11<br>(2-28)  | 100<br>(98-100) | 100<br>(29-100) | 86<br>(79-90) | Infinite | 0.9<br>(0.8-1.0) | Infinite |                                                        |
| 0.5 OD<br>(Validation cohort)      |                                                                         |                                                                                                      | 22<br>(6-48)  | 100<br>(98-100) | 100<br>(40-100) | 92<br>(86-95) | Infinite | 0.8<br>(0.6-1.0) | Infinite |                                                        |
| Lahmer et al.,<br>2021** [3]       | Observational<br>Prospective<br>Modified<br>AspICU (see the<br>original | Proven/putative<br>11/32 (34)                                                                        |               |                 |                 |               |          |                  |          | Critically ill patients with severe COVID-19 pneumonia |

|                                   | publication for details)                                               |                                                          |               |                |                |               |                     |                  |                                           |
|-----------------------------------|------------------------------------------------------------------------|----------------------------------------------------------|---------------|----------------|----------------|---------------|---------------------|------------------|-------------------------------------------|
| 0.5 OD                            |                                                                        |                                                          | 36<br>(NA-NA) | 100<br>(NA-NA) | NA<br>(NA-NA)  | NA<br>(NA-NA) | NA<br>(NA-NA)       | NA<br>(NA-NA)    | NA<br>(NA-NA)                             |
| Levesque et al.,<br>2019* [4]     | Observational<br>Retrospective<br>AspICU criteria [5]                  | Proven/putative<br>IPA vs.<br>colonization<br>12/42 (29) |               |                |                |               |                     |                  | Cirrhotic patients<br>hospitalized in ICU |
| Positive<br>(no cut-off reported) |                                                                        |                                                          | 83<br>(52-98) | 87<br>(69-96)  | 71<br>(42-92)  | 93<br>(76-99) | 6.3<br>(2.4-16.1)   | 0.2<br>(0.1-0.7) | 32.5<br>(NA-NA)                           |
| Prattes et al.,<br>2021* [6]      | Observational<br>Prospective<br>ECMM/ISHAM<br>criteria for<br>CAPA [2] | Proven/probable/po<br>ssible CAPA<br>109/592 (18)        |               |                |                |               |                     |                  | ICU patients with COVID-<br>19            |
| 0.5 OD                            |                                                                        |                                                          | 19<br>(11-29) | 99<br>(97-100) | 94<br>(71-100) | 73<br>(68-79) | 36.1<br>(4.9-268.1) | 0.8<br>(0.7-0.9) | 44.3<br>(NA-NA)                           |

|                           |                                                       |                                                |               |               |               |               |                  |                  |                |                                                              |
|---------------------------|-------------------------------------------------------|------------------------------------------------|---------------|---------------|---------------|---------------|------------------|------------------|----------------|--------------------------------------------------------------|
| Yu et al.,<br>2019*** [7] | Observational<br>Prospective<br>EORTC/MSG<br>2008 [8] | Proven/probable<br>vs. possible<br>78/184 (42) |               |               |               |               |                  |                  |                | Nonneutropenic ICU<br>patients with at least<br>possible IPA |
| 0.5 OD                    |                                                       |                                                | 83<br>(73-91) | 47<br>(38-57) | 51<br>(42-60) | 81<br>(70-90) | 1.6<br>(1.3-1.9) | 0.4<br>(0.2-0.6) | 4.5<br>(NA-NA) |                                                              |
| 0.87 OD                   |                                                       |                                                | 64<br>(NA-NA) | 81<br>(NA-NA) | NA<br>(NA-NA) | NA<br>(NA-NA) | NA<br>(NA-NA)    | NA<br>(NA-NA)    | NA<br>(NA-NA)  |                                                              |
| 1.0 OD                    |                                                       |                                                | 55<br>(43-66) | 82<br>(74-89) | 67<br>(54-78) | 73<br>(65-81) | 3.1<br>(2.0-4.8) | 0.6<br>(0.4-0.7) | 5.7<br>(NA-NA) |                                                              |

---

**Diagnostic performance of BALF GM**

---

| Study                        | Design                                                                 | Type of IPA #                                                                                            | Sensitivity % | Specificity % | PPV %    | NPV %    | LR+      | LR-      | DOR      | Population                     |
|------------------------------|------------------------------------------------------------------------|----------------------------------------------------------------------------------------------------------|---------------|---------------|----------|----------|----------|----------|----------|--------------------------------|
| GM cut-off                   | Timeline                                                               | IPA prevalence ##                                                                                        | (95% CI)      | (95% CI)      | (95% CI) | (95% CI) | (95% CI) | (95% CI) | (95% CI) |                                |
|                              | Reference                                                              | N/total (%)                                                                                              |               |               |          |          |          |          |          |                                |
| Janssen et al.,<br>2021* [1] | Observational<br>Prospective<br>ECMM/ISHAM<br>criteria for<br>CAPA [2] | Proven/probable/po<br>ssible CAPA<br>Discovery cohort<br>42/279 (15)<br>Validation cohort<br>21/209 (10) |               |               |          |          |          |          |          | ICU patients with COVID-<br>19 |

|                               |               |                 |                 |               |          |                  |          |
|-------------------------------|---------------|-----------------|-----------------|---------------|----------|------------------|----------|
| 1.0 OD<br>(Discovery cohort)  | 78<br>(62-89) | 100<br>(97-100) | 100<br>(89-100) | 93<br>(88-97) | Infinite | 0.2<br>(0.1-0.4) | Infinite |
| 1.0 OD<br>(Validation cohort) | 62<br>(38-82) | 100<br>(96-100) | 100<br>(75-100) | 93<br>(86-97) | Infinite | 0.4<br>(0.2-0.7) | Infinite |

|                              |                                                                                                            |                               |               |               |                   |                  |                 |                                                              |
|------------------------------|------------------------------------------------------------------------------------------------------------|-------------------------------|---------------|---------------|-------------------|------------------|-----------------|--------------------------------------------------------------|
| Jenks et al.,<br>2019*** [9] | Observational<br>Prospective<br><br>Modified<br>AspICU (see the<br>original<br>publication for<br>details) | Proven/putative<br>26/82 (32) |               |               |                   |                  |                 | Mixed wards (ICU, other).<br>Non-hematological patients      |
| 0.5 OD                       | 92<br>(75-99)                                                                                              | 73<br>(60-84)                 | 62<br>(45-77) | 95<br>(84-99) | 3.5<br>(2.2-5.4)  | 0.1<br>(0.0-0.4) | 32.8<br>(NA-NA) |                                                              |
| 1.0 OD                       | 85<br>(65-96)                                                                                              | 88<br>(76-95)                 | 76<br>(56-90) | 92<br>(82-98) | 6.8<br>(3.3-13.8) | 0.2<br>(0.1-0.4) | 38.5<br>(NA-NA) |                                                              |
| Lahmer et al.,<br>2021** [3] | Observational<br>Prospective                                                                               | Proven/putative<br>11/32 (34) |               |               |                   |                  |                 | Critically ill patients with<br>severe COVID-19<br>pneumonia |

|                               |                                                                 |                                               |                |                 |                 |                |                     |                  |                            |
|-------------------------------|-----------------------------------------------------------------|-----------------------------------------------|----------------|-----------------|-----------------|----------------|---------------------|------------------|----------------------------|
|                               | Modified AspICU (see the original publication for details)      |                                               |                |                 |                 |                |                     |                  |                            |
| 1.0 OD                        |                                                                 |                                               | 95<br>(NA-NA)  | 87<br>(NA-NA)   | NA<br>(NA-NA)   | NA<br>(NA-NA)  | NA<br>(NA-NA)       | NA<br>(NA-NA)    | NA<br>(NA-NA)              |
| Mikulska et al., 2022*** [10] | Observational Retrospective<br>ECMM/ISHAM criteria for CAPA [2] | Proven/probable CAPA<br>15/59 (25)            |                |                 |                 |                |                     |                  | ICU patients with COVID-19 |
| 1.0 OD                        |                                                                 |                                               | 93<br>(68-100) | 100<br>(92-100) | 100<br>(77-100) | 98<br>(88-100) | Infinite            | 0.1<br>(0.0-0.4) | Infinite                   |
| Prattes et al., 2021* [6]     | Observational Prospective<br>ECMM/ISHAM criteria for CAPA [2]   | Proven/probable/possible CAPA<br>109/592 (18) |                |                 |                 |                |                     |                  | ICU patients with COVID-19 |
| 1.0 OD                        |                                                                 |                                               | 77<br>(67-86)  | 98<br>(94-99)   | 94<br>(86-98)   | 90<br>(84-94)  | 32.8<br>(12.4-86.9) | 0.2<br>(0.2-0.4) | 139.8<br>(NA-NA)           |

| Yu et al.,<br>2019*** [7]                  | Observational<br>Prospective<br>EORTC/MSG<br>2008 [8] | Proven/probable<br>vs. possible<br>78/184 (42) |                 |                 |               |                    |                  |                 | Nonneutropenic ICU<br>patients with at least<br>possible IPA |
|--------------------------------------------|-------------------------------------------------------|------------------------------------------------|-----------------|-----------------|---------------|--------------------|------------------|-----------------|--------------------------------------------------------------|
| 0.5 OD                                     |                                                       | 79<br>(69-88)                                  | 60<br>(51-69)   | 57<br>(47-66)   | 82<br>(72-89) | 2.0<br>(1.6-2.6)   | 0.3<br>(0.2-0.5) | 5.6<br>(NA-NA)  |                                                              |
| 0.8 OD                                     |                                                       | 76<br>(65-85)                                  | 86<br>(78-91)   | 78<br>(67-86)   | 84<br>(76-90) | 5.3<br>(3.3-8.3)   | 0.3<br>(0.2-0.4) | 18.4<br>(NA-NA) |                                                              |
| 0.86 OD                                    |                                                       | 74<br>(NA-NA)                                  | 88<br>(NA-NA)   | NA<br>(NA-NA)   | NA<br>(NA-NA) | NA<br>(NA-NA)      | NA<br>(NA-NA)    | NA<br>(NA-NA)   |                                                              |
| 1.0 OD                                     |                                                       | 58<br>(46-69)                                  | 95<br>(89-98)   | 88<br>(66-96)   | 77<br>(70-84) | 11.4<br>(5.0-25.3) | 0.5<br>(0.3-0.6) | 25.5<br>(NA-NA) |                                                              |
| 1.5 OD                                     |                                                       | 26<br>(16-37)                                  | 100<br>(97-100) | 100<br>(83-100) | 67<br>(60-74) | Infinite           | 0.7<br>(0.7-0.9) | Infinite        |                                                              |
| 2.0 OD                                     |                                                       | 14<br>(7-24)                                   | 100<br>(97-100) | 100<br>(72-100) | 64<br>(56-71) | Infinite           | 0.9<br>(0.8-0.9) | Infinite        |                                                              |
| 2.94 OD<br>(Corrected by<br>urea dilution) |                                                       | 86<br>(NA-NA)                                  | 94<br>(NA-NA)   | NA<br>(NA-NA)   | NA<br>(NA-NA) | NA<br>(NA-NA)      | NA<br>(NA-NA)    | NA<br>(NA-NA)   |                                                              |

|        |             |                 |                 |               |          |                  |          |
|--------|-------------|-----------------|-----------------|---------------|----------|------------------|----------|
| 3.0 OD | 5<br>(1-13) | 100<br>(97-100) | 100<br>(40-100) | 61<br>(54-68) | Infinite | 1.0<br>(0.9-1.0) | Infinite |
|--------|-------------|-----------------|-----------------|---------------|----------|------------------|----------|

---

### Diagnostic performance of TA GM

---

| Study                               | Design                                                                                                       | Type of IPA #                      | Sensitivity %<br>(95% CI) | Specificity %<br>(95% CI) | PPV %<br>(95% CI) | NPV %<br>(95% CI) | LR+<br>(95% CI) | LR-<br>(95% CI) | DOR<br>(95% CI) | Population                 |
|-------------------------------------|--------------------------------------------------------------------------------------------------------------|------------------------------------|---------------------------|---------------------------|-------------------|-------------------|-----------------|-----------------|-----------------|----------------------------|
| GM cut-off                          | Timeline                                                                                                     | IPA prevalence ##<br>N/total (%)   |                           |                           |                   |                   |                 |                 |                 |                            |
|                                     | Reference                                                                                                    |                                    |                           |                           |                   |                   |                 |                 |                 |                            |
| Roman-Montes et al.,<br>2021** [11] | Observational<br>Retrospective<br><br>Modified<br>AspICU (see the<br>original<br>publication for<br>details) | Proven/putative<br><br>14/144 (10) |                           |                           |                   |                   |                 |                 |                 | ICU patients with COVID-19 |
| 2.0 OD                              |                                                                                                              |                                    | 57<br>(29-82)             | 82<br>(74-88)             | 25<br>(16-37)     | 95<br>(91-97)     | NA<br>(NA-NA)   | NA<br>(NA-NA)   | NA<br>(NA-NA)   |                            |

BALF, bronchoalveolar lavage fluid; CAPA, coronavirus disease 2019-associated pulmonary aspergillosis; CI, confidence intervals; DOR, diagnostic odds ratio; ECMM, European Confederation of Medical Mycology; EORTC/MSG, European Organization for Research and Treatment of Cancer/Invasive Fungal Infections Cooperative Group and the National Institute of Allergy and Infectious Diseases Mycoses Study Group; GM, galactomannan; ICU, intensive care unit; IPA, invasive pulmonary aspergillosis; ISHAM, International Society for Human and Animal Mycology; NA, not available; LR-, negative likelihood ratio; LR+, positive likelihood ratio; NPV, negative predictive value; OD, optical density; PPV, positive predictive value; TA, tracheal aspirate.

\* Diagnostic performance parameters and 95% CI calculated for the present systematic review from data included in the original publication.

\*\* Diagnostic performance parameters and 95% CI directly available in the original publication are presented.

\*\*\* Diagnostic performance parameters and 95% CI partly available in the original publication and partly calculated for this systematic review from data included in the original publication.

# Type of IA defining the reference positivity (e.g., proven/probable = proven and probable classified as IPA vs. possible and other patients classified as non-IPA, proven/probable/possible = proven and probable and possible classified as IPA vs. other patients classified as non-IPA)

## Number of IPA patients according to the reference positivity (see #)/Number of IPA patients plus non-IPA patients.



**Supplementary table 2. Studies assessing the performance of laboratory tests other than galactomannan for the diagnosis of IPA in critically ill patients with existing definitions as reference**

| Diagnostic performance of respiratory cultures |                                                                          |                                                                                                         |               |                 |                 |               |          |                  |          |                                                             |
|------------------------------------------------|--------------------------------------------------------------------------|---------------------------------------------------------------------------------------------------------|---------------|-----------------|-----------------|---------------|----------|------------------|----------|-------------------------------------------------------------|
| Study                                          | Design                                                                   | Type of IPA #                                                                                           | Sensitivity % | Specificity %   | PPV %           | NPV %         | LR+      | LR-              | DOR      | Population                                                  |
| Type of culture                                | Timeline                                                                 | IPA prevalence ##                                                                                       | (95% CI)      | (95% CI)        | (95% CI)        | (95% CI)      | (95% CI) | (95% CI)         | (95% CI) |                                                             |
|                                                | Reference                                                                | N/total (%)                                                                                             |               |                 |                 |               |          |                  |          |                                                             |
| Janssen et al.,<br>2021* [1]                   | Observational<br>Prospective<br>ECMM/ISHAM<br>criteria for<br>CAPA [2]   | Proven/probable/possible<br>CAPA<br>Discovery cohort<br>42/279 (15)<br>Validation cohort<br>21/209 (10) |               |                 |                 |               |          |                  |          | ICU patients with<br>COVID-19                               |
| BALF culture<br>(Discovery cohort)             |                                                                          |                                                                                                         | 41<br>(26-58) | 100<br>(97-100) | 100<br>(80-100) | 84<br>(77-89) | Infinite | 0.6<br>(0.5-0.8) | Infinite |                                                             |
| BALF culture<br>(Validation cohort)            |                                                                          |                                                                                                         | 52<br>(30-74) | 100<br>(97-100) | 100<br>(72-100) | 92<br>(86-96) | Infinite | 0.5<br>(0.3-0.8) | Infinite |                                                             |
| Jenks et al.,<br>2019*** [9]                   | Observational<br>Prospective<br>Modified<br>AspICU (see<br>the original) | Proven/putative<br>26/82 (32)                                                                           |               |                 |                 |               |          |                  |          | Mixed wards (ICU,<br>other). Non-<br>hematological patients |

|                              |                                                                                                        |                                                  |               |                 |                 |               |                   |                  |                                                              |
|------------------------------|--------------------------------------------------------------------------------------------------------|--------------------------------------------------|---------------|-----------------|-----------------|---------------|-------------------|------------------|--------------------------------------------------------------|
|                              | publication for details)                                                                               |                                                  |               |                 |                 |               |                   |                  |                                                              |
| BALF culture                 |                                                                                                        |                                                  | 35<br>(17-56) | 95<br>(85-99)   | 75<br>(43-95)   | 76<br>(64-85) | 6.5<br>(1.9-21.9) | 0.7<br>(0.5-0.9) | 9.4<br>(NA-NA)                                               |
| Lahmer et al.,<br>2021** [3] | Observational<br>Prospective<br>Modified<br>AspICU (see<br>the original<br>publication for<br>details) | Proven/putative<br>11/32 (34)                    |               |                 |                 |               |                   |                  | Critically ill patients with<br>severe COVID-19<br>pneumonia |
| BALF culture                 |                                                                                                        |                                                  | 82<br>(NA-NA) | 100<br>(NA-NA)  | NA<br>(NA-NA)   | NA<br>(NA-NA) | NA<br>(NA-NA)     | NA<br>(NA-NA)    | NA<br>(NA-NA)                                                |
| Prattes et al.,<br>2021* [6] | Observational<br>Prospective<br>ECMM/ISHAM<br>criteria for<br>CAPA [2]                                 | Proven/probable/possible<br>CAPA<br>109/592 (18) |               |                 |                 |               |                   |                  | ICU patients with<br>COVID-19                                |
| BALF culture                 |                                                                                                        |                                                  | 53<br>(42-64) | 100<br>(98-100) | 100<br>(92-100) | 82<br>(76-87) | Infinite          | 0.5<br>(0.4-0.6) | Infinite                                                     |

| <b>Diagnostic performance of serum BDG</b> |                                                                        |                                                 |                      |                      |                 |                 |                  |                  |                 |                                                              |
|--------------------------------------------|------------------------------------------------------------------------|-------------------------------------------------|----------------------|----------------------|-----------------|-----------------|------------------|------------------|-----------------|--------------------------------------------------------------|
| <b>Study</b>                               | <b>Design</b>                                                          | <b>Type of IPA #</b>                            | <b>Sensitivity %</b> | <b>Specificity %</b> | <b>PPV %</b>    | <b>NPV %</b>    | <b>LR+</b>       | <b>LR-</b>       | <b>DOR</b>      | <b>Population</b>                                            |
| <b>BDG cut-off</b>                         | <b>Timeline</b>                                                        | <b>IPA prevalence ##</b>                        | <b>(95% CI)</b>      | <b>(95% CI)</b>      | <b>(95% CI)</b> | <b>(95% CI)</b> | <b>(95% CI)</b>  | <b>(95% CI)</b>  | <b>(95% CI)</b> |                                                              |
|                                            | <b>Reference</b>                                                       | <b>N/total (%)</b>                              |                      |                      |                 |                 |                  |                  |                 |                                                              |
| Janssen et al.,<br>2021* [1]               | Observational<br>Prospective<br>ECMM/ISHAM<br>criteria for<br>CAPA [2] | Proven/probable/possible<br>CAPA<br>21/209 (10) |                      |                      |                 |                 |                  |                  |                 | ICU patients with<br>COVID-19                                |
| 80 pg/ml                                   |                                                                        |                                                 | 42<br>(20-67)        | 82<br>(75-88)        | 22<br>(10-38)   | 92<br>(87-96)   | 2.3<br>(1.3-4.3) | 0.7<br>(0.5-1.0) | 3.3<br>(NA-NA)  |                                                              |
| Yu et al.,<br>2019** [7]                   | Observational<br>Prospective<br>EORTC/MSG<br>2008 [8]                  | Proven/probable vs.<br>possible<br>78/184 (42)  |                      |                      |                 |                 |                  |                  |                 | Nonneutropenic ICU<br>patients with at least<br>possible IPA |
| 68.23 pg/ml                                |                                                                        |                                                 | 91<br>(NA-NA)        | 66<br>(NA-NA)        | NA<br>(NA-NA)   | NA<br>(NA-NA)   | NA<br>(NA-NA)    | NA<br>(NA-NA)    | NA<br>(NA-NA)   |                                                              |
| <b>Diagnostic performance of BALF LFD</b>  |                                                                        |                                                 |                      |                      |                 |                 |                  |                  |                 |                                                              |

| Study                               | Design                                                     | Type of IPA #                     | Sensitivity % | Specificity % | PPV %         | NPV %         | LR+              | LR-              | DOR            | Population                                           |
|-------------------------------------|------------------------------------------------------------|-----------------------------------|---------------|---------------|---------------|---------------|------------------|------------------|----------------|------------------------------------------------------|
|                                     | Timeline                                                   | IPA prevalence ##                 | (95% CI)         | (95% CI)         | (95% CI)       |                                                      |
|                                     | Reference                                                  | N/total (%)                       |               |               |               |               |                  |                  |                |                                                      |
| Jenks et al.,<br>2019** [9]         | Observational                                              | Proven/putative                   |               |               |               |               |                  |                  |                | Mixed wards (ICU, other). Non-hematological patients |
|                                     | Prospective                                                | 26/82 (32)                        |               |               |               |               |                  |                  |                |                                                      |
|                                     | Modified AspICU (see the original publication for details) |                                   |               |               |               |               |                  |                  |                |                                                      |
| Positive LFD<br>(Read after 15 min) |                                                            |                                   | 58<br>(37-77) | 75<br>(62-86) | 52<br>(33-71) | 79<br>(66-89) | 2.3<br>(1.3-4.0) | 0.6<br>(0.4-0.9) | 4.1<br>(NA-NA) |                                                      |
| Positive LFD<br>(Read after 25 min) |                                                            |                                   | 69<br>(48-86) | 71<br>(58-83) | 53<br>(35-70) | 83<br>(70-93) | 2.4<br>(1.5-3.9) | 0.4<br>(0.2-0.8) | 5.6<br>(NA-NA) |                                                      |
| Scharmann et al.,<br>2020** [12]    | Observational                                              | Proven/putative (AspICU)          |               |               |               |               |                  |                  |                | Mixed (mostly ICU, non-hematological patients)       |
|                                     | Prospective                                                | 27/154 (16)                       |               |               |               |               |                  |                  |                |                                                      |
|                                     | AspICU [5]                                                 | Proven/putative (modified AspICU) |               |               |               |               |                  |                  |                |                                                      |
|                                     | Modified AspICU (see the original publication for details) | 111/175 (63)                      |               |               |               |               |                  |                  |                |                                                      |
|                                     | EORTC/MSGERC 2020 [13]                                     | Proven/probable (EORTC/MSGERC)    | 30/101 (30)   |               |               |               |                  |                  |                |                                                      |
| Modified AspICU with                | Proven/putative (modified Asp/ICU with                     |                                   |               |               |               |               |                  |                  |                |                                                      |

GM  $\geq$ 1 as entry criterion    GM  $\geq$ 1 as entry criterion)

56/177 (32)

|                                                                             |               |               |               |               |               |               |               |
|-----------------------------------------------------------------------------|---------------|---------------|---------------|---------------|---------------|---------------|---------------|
| Positive LFD<br>(AspICU)                                                    | 89<br>(71-98) | 55<br>(47-63) | 27<br>(23-31) | 96<br>(90-99) | NA<br>(NA-NA) | NA<br>(NA-NA) | NA<br>(NA-NA) |
| Positive LFD<br>(Modified AspICU)                                           | 69<br>(59-77) | 67<br>(54-78) | 78<br>(71-84) | 55<br>(47-63) | NA<br>(NA-NA) | NA<br>(NA-NA) | NA<br>(NA-NA) |
| Positive LFD<br>(EORTC/MSGERC)                                              | 73<br>(54-88) | 49<br>(37-61) | 38<br>(31-46) | 81<br>(70-89) | NA<br>(NA-NA) | NA<br>(NA-NA) | NA<br>(NA-NA) |
| Positive LFD<br>(Modified AspICU<br>with GM $\geq$ 1<br>as entry criterion) | 61<br>(47-74) | 47<br>(38-56) | 35<br>(29-41) | 72<br>(64-79) | NA<br>(NA-NA) | NA<br>(NA-NA) | NA<br>(NA-NA) |

---

**Diagnostic performance of BALF GM-LFA**

---

| Study          | Design    | Type of IPA #     | Sensitivity % | Specificity % | PPV %    | NPV %    | LR+      | LR-      | DOR      | Population |
|----------------|-----------|-------------------|---------------|---------------|----------|----------|----------|----------|----------|------------|
| GM-LFA cut-off | Timeline  | IPA prevalence ## | (95% CI)      | (95% CI)      | (95% CI) | (95% CI) | (95% CI) | (95% CI) | (95% CI) |            |
|                | Reference | N/total (%)       |               |               |          |          |          |          |          |            |

---

|                                   |                                                                                                          |                                |               |               |               |               |                  |                  |                                                             |
|-----------------------------------|----------------------------------------------------------------------------------------------------------|--------------------------------|---------------|---------------|---------------|---------------|------------------|------------------|-------------------------------------------------------------|
| Jenks et al.,<br>2019*** [9]      | Observational<br>Prospective<br>Modified<br>AspICU (see<br>the original<br>publication for<br>details)   | Proven/putative<br>26/82 (32)  |               |               |               |               |                  |                  | Mixed wards (ICU,<br>other). Non-<br>hematological patients |
| Positive<br>(no cut-off reported) |                                                                                                          |                                | 65<br>(44-83) | 68<br>(54-80) | 49<br>(31-66) | 81<br>(67-91) | 2.0<br>(1.3-3.3) | 0.5<br>(0.3-0.9) | 4.0<br>(NA-NA)                                              |
| Jenks et al.,<br>2021*** [14]     | Observational<br>Retrospective<br>Modified<br>AspICU (see<br>the original<br>publication for<br>details) | Proven/putative<br>44/153 (29) |               |               |               |               |                  |                  | Mixed wards (ICU,<br>other). Non-<br>hematological patients |
| 0.5 OD                            |                                                                                                          |                                | 86<br>(73-95) | 48<br>(38-57) | 40<br>(30-51) | 90<br>(79-96) | 1.7<br>(1.3-2.1) | 0.3<br>(0.1-0.6) | 5.8<br>(NA-NA)                                              |
| 1.0 OD                            |                                                                                                          |                                | 80<br>(65-90) | 75<br>(66-83) | 56<br>(43-69) | 90<br>(82-95) | 3.2<br>(2.2-4.6) | 0.3<br>(0.2-0.5) | 11.8<br>(NA-NA)                                             |
| 1.5 OD                            |                                                                                                          |                                | 73<br>(57-85) | 83<br>(75-90) | 64<br>(49-77) | 88<br>(81-94) | 4.4<br>(2.8-7.0) | 0.3<br>(0.2-0.5) | 13.5<br>(NA-NA)                                             |

|        |         |         |         |         |           |           |         |
|--------|---------|---------|---------|---------|-----------|-----------|---------|
| 2.0 OD | 70      | 84      | 65      | 88      | 4.5       | 0.4       | 12.9    |
|        | (55-83) | (76-91) | (49-78) | (80-93) | (2.8-7.3) | (0.2-0.6) | (NA-NA) |

|                                  |                                                                                                                                                                                                                    |                                                                                                                                                                                                                                                          |  |  |  |  |  |                                                |
|----------------------------------|--------------------------------------------------------------------------------------------------------------------------------------------------------------------------------------------------------------------|----------------------------------------------------------------------------------------------------------------------------------------------------------------------------------------------------------------------------------------------------------|--|--|--|--|--|------------------------------------------------|
| Scharmann et al.,<br>2020** [12] | Observational<br>Prospective<br>AspICU [5]<br>Modified<br>AspICU (see<br>the original<br>publication for<br>details)<br>EORTC/MSGE<br>RC 2020 [13]<br>Modified<br>AspICU with<br>GM $\geq 1$ as entry<br>criterion | Proven/putative<br>(AspICU)<br>27/154 (16)<br>Proven/putative<br>(modified AspICU)<br>111/175 (63)<br>Proven/probable<br>(EORTC/MSGERC)<br>30/101 (30)<br>Proven/putative<br>(modified Asp/ICU with<br>GM $\geq 1$ as entry<br>criterion)<br>56/177 (32) |  |  |  |  |  | Mixed (mostly ICU, non-hematological patients) |
|----------------------------------|--------------------------------------------------------------------------------------------------------------------------------------------------------------------------------------------------------------------|----------------------------------------------------------------------------------------------------------------------------------------------------------------------------------------------------------------------------------------------------------|--|--|--|--|--|------------------------------------------------|

|                    |         |         |         |         |         |         |         |
|--------------------|---------|---------|---------|---------|---------|---------|---------|
| 1.0 OD<br>(AspICU) | 93      | 46      | 25      | 97      | NA      | NA      | NA      |
|                    | (78-99) | (38-54) | (22-29) | (90-99) | (NA-NA) | (NA-NA) | (NA-NA) |

|                             |         |         |         |         |         |         |         |
|-----------------------------|---------|---------|---------|---------|---------|---------|---------|
| 1.0 OD<br>(Modified AspICU) | 85      | 73      | 84      | 75      | NA      | NA      | NA      |
|                             | (78-91) | (61-83) | (78-89) | (65-83) | (NA-NA) | (NA-NA) | (NA-NA) |

|                          |         |         |         |         |         |         |         |
|--------------------------|---------|---------|---------|---------|---------|---------|---------|
| 1.0 OD<br>(EORTC/MSGERC) | 87      | 51      | 42      | 91      | NA      | NA      | NA      |
|                          | (70-96) | (39-62) | (35-48) | (79-96) | (NA-NA) | (NA-NA) | (NA-NA) |

|                                                                       |               |               |               |               |               |               |               |
|-----------------------------------------------------------------------|---------------|---------------|---------------|---------------|---------------|---------------|---------------|
| 1.0 OD<br>(Modified AspICU<br>with GM $\geq$ 1<br>as entry criterion) | 80<br>(67-89) | 45<br>(36-54) | 40<br>(35-45) | 83<br>(74-89) | NA<br>(NA-NA) | NA<br>(NA-NA) | NA<br>(NA-NA) |
|-----------------------------------------------------------------------|---------------|---------------|---------------|---------------|---------------|---------------|---------------|

---

**Diagnostic performance of TA GM-LFA**

| <b>Study</b>                        | <b>Design</b>                                                                                                | <b>Type of IA #</b>                | <b>Sensitivity %</b> | <b>Specificity %</b> | <b>PPV %</b>    | <b>NPV %</b>    | <b>LR+</b>      | <b>LR-</b>      | <b>DOR</b>      | <b>Population</b>             |
|-------------------------------------|--------------------------------------------------------------------------------------------------------------|------------------------------------|----------------------|----------------------|-----------------|-----------------|-----------------|-----------------|-----------------|-------------------------------|
| <b>GM-LFA cut-off</b>               | <b>Timeline</b>                                                                                              | <b>IA prevalence ##</b>            | <b>(95% CI)</b>      | <b>(95% CI)</b>      | <b>(95% CI)</b> | <b>(95% CI)</b> | <b>(95% CI)</b> | <b>(95% CI)</b> | <b>(95% CI)</b> |                               |
|                                     | <b>Reference</b>                                                                                             | <b>N/total (%)</b>                 |                      |                      |                 |                 |                 |                 |                 |                               |
| Roman-Montes et al.,<br>2021** [11] | Observational<br>Retrospective<br><br>Modified<br>AspICU (see<br>the original<br>publication for<br>details) | Proven/putative<br><br>14/144 (10) |                      |                      |                 |                 |                 |                 |                 | ICU patients with<br>COVID-19 |
| 2.0 OD                              |                                                                                                              |                                    | 60<br>(26-88)        | 73<br>(63-81)        | 19<br>(11-30)   | 95<br>(89-97)   | NA<br>(NA-NA)   | NA<br>(NA-NA)   | NA<br>(NA-NA)   |                               |

---

**Diagnostic performance of BALF PCR**

| <b>Study</b>       | <b>Design</b>    | <b>Type of IPA #</b>     | <b>Sensitivity %</b> | <b>Specificity %</b> | <b>PPV %</b>    | <b>NPV %</b>    | <b>LR+</b>      | <b>LR-</b>      | <b>DOR</b>      | <b>Population</b> |
|--------------------|------------------|--------------------------|----------------------|----------------------|-----------------|-----------------|-----------------|-----------------|-----------------|-------------------|
| <b>Type of PCR</b> | <b>Timeline</b>  | <b>IPA prevalence ##</b> | <b>(95% CI)</b>      | <b>(95% CI)</b>      | <b>(95% CI)</b> | <b>(95% CI)</b> | <b>(95% CI)</b> | <b>(95% CI)</b> | <b>(95% CI)</b> |                   |
|                    | <b>Reference</b> | <b>N/total (%)</b>       |                      |                      |                 |                 |                 |                 |                 |                   |



|                              |                                                                        |                                                                                                         |  |  |  |  |  |  |                               |
|------------------------------|------------------------------------------------------------------------|---------------------------------------------------------------------------------------------------------|--|--|--|--|--|--|-------------------------------|
| Janssen et al.,<br>2021* [1] | Observational<br>Prospective<br>ECMM/ISHAM<br>criteria for<br>CAPA [2] | Proven/probable/possible<br>CAPA<br>Discovery cohort<br>42/279 (15)<br>Validation cohort<br>21/209 (10) |  |  |  |  |  |  | ICU patients with<br>COVID-19 |
|------------------------------|------------------------------------------------------------------------|---------------------------------------------------------------------------------------------------------|--|--|--|--|--|--|-------------------------------|

|                                    |              |               |               |               |                   |                  |                |
|------------------------------------|--------------|---------------|---------------|---------------|-------------------|------------------|----------------|
| Positive PCR<br>(Discovery cohort) | 17<br>(7-32) | 97<br>(92-99) | 64<br>(31-89) | 78<br>(71-84) | 5.3<br>(1.6-17.3) | 0.9<br>(0.7-1.0) | 6.2<br>(NA-NA) |
|------------------------------------|--------------|---------------|---------------|---------------|-------------------|------------------|----------------|

|                                     |               |                 |                 |               |          |                  |          |
|-------------------------------------|---------------|-----------------|-----------------|---------------|----------|------------------|----------|
| Positive PCR<br>(Validation cohort) | 53<br>(27-79) | 100<br>(93-100) | 100<br>(73-100) | 88<br>(76-95) | Infinite | 0.5<br>(0.3-0.8) | Infinite |
|-------------------------------------|---------------|-----------------|-----------------|---------------|----------|------------------|----------|

|                                  |                                                                          |                               |  |  |  |  |  |  |                               |
|----------------------------------|--------------------------------------------------------------------------|-------------------------------|--|--|--|--|--|--|-------------------------------|
| Mikulska et al.,<br>2022*** [10] | Observational<br>Retrospective<br>ECMM/ISHAM<br>criteria for<br>CAPA [2] | Proven/probable<br>15/59 (25) |  |  |  |  |  |  | ICU patients with<br>COVID-19 |
|----------------------------------|--------------------------------------------------------------------------|-------------------------------|--|--|--|--|--|--|-------------------------------|

|              |               |                |                |               |                     |                  |                 |
|--------------|---------------|----------------|----------------|---------------|---------------------|------------------|-----------------|
| AsperGenius® | 40<br>(16-68) | 98<br>(88-100) | 86<br>(42-100) | 83<br>(70-92) | 17.6<br>(2.3-134.6) | 0.6<br>(0.4-0.9) | 28.7<br>(NA-NA) |
|--------------|---------------|----------------|----------------|---------------|---------------------|------------------|-----------------|

---

**Diagnostic performance of tests combinations**

---

| Study | Design | Type of IPA # | Sensitivity % | Specificity % | PPV % | NPV % | LR+ | LR- | DOR | Population |
|-------|--------|---------------|---------------|---------------|-------|-------|-----|-----|-----|------------|
|-------|--------|---------------|---------------|---------------|-------|-------|-----|-----|-----|------------|

| Type of tests<br>(cut-off)                          | Timeline<br>Reference <sup>#</sup>                                                                     | IPA prevalence <sup>##</sup><br>N/total (%)     | (95% CI)             | (95% CI)         | (95% CI)                                                    |
|-----------------------------------------------------|--------------------------------------------------------------------------------------------------------|-------------------------------------------------|-----------------|-----------------|-----------------|-----------------|----------------------|------------------|-------------------------------------------------------------|
| Giacobbe et al.,<br>2022* [15]                      | Observational<br>Prospective<br>ECMM/ISHAM<br>criteria for<br>CAPA [2]                                 | Proven/probable/possible<br>CAPA<br>56/218 (26) |                 |                 |                 |                 |                      |                  | ICU patients with<br>COVID-19                               |
| BALF GM (1.0 OD)<br>and/or<br>positive BALF culture |                                                                                                        |                                                 | 100<br>(94-100) | 98<br>(94-99)   | 93<br>(84-98)   | 100<br>(98-100) | 40.5<br>(15.4-106.6) | NA<br>(NA-NA)    | Infinite                                                    |
| BALF GM (1.0 OD)<br>and<br>positive BALF culture    |                                                                                                        |                                                 | 50<br>(36-64)   | 100<br>(98-100) | 100<br>(88-100) | 85<br>(79-90)   | Infinite             | 0.5<br>(0.4-0.7) | Infinite                                                    |
| Jenks et al.,<br>2019*** [9]                        | Observational<br>Prospective<br>Modified<br>AspICU (see<br>the original<br>publication for<br>details) | Proven/putative<br>26/82 (32)                   |                 |                 |                 |                 |                      |                  | Mixed wards (ICU,<br>other). Non-<br>hematological patients |
| Positive BALF LFD<br>(Read after 15 min)            |                                                                                                        |                                                 | 77<br>(56-91)   | 64<br>(50-77)   | 50<br>(34-66)   | 86<br>(71-95)   | 2.2<br>(1.4-3.2)     | 0.4<br>(0.2-0.7) | 6.0<br>(NA-NA)                                              |

and/or positive

BALF GM-LFA

Positive BALF LFD

(Read after 25 min)

and/or positive

BALF GM-LFA

|         |         |         |         |           |           |         |
|---------|---------|---------|---------|-----------|-----------|---------|
| 81      | 61      | 49      | 87      | 2.1       | 0.3       | 6.5     |
| (61-93) | (47-74) | (33-65) | (73-96) | (1.4-3.0) | (0.1-0.7) | (NA-NA) |

Mikulska et al.,  
2022\*\*\* [10]

Observational Proven/probable  
Retrospective 15/59 (25)  
ECMM/ISHAM  
criteria for  
CAPA [2]

ICU patients with  
COVID-19

AsperGenius®

and/or BALF

GM (1.0 OD)

|          |          |          |          |             |           |         |
|----------|----------|----------|----------|-------------|-----------|---------|
| 93       | 98       | 93       | 98       | 41.1        | 0.1       | 602.0   |
| (68-100) | (88-100) | (68-100) | (88-100) | (5.9-286.4) | (0.0-0.5) | (NA-NA) |

AsperGenius®

and BALF

GM (1.0 OD)

|         |          |          |         |             |           |         |
|---------|----------|----------|---------|-------------|-----------|---------|
| 40      | 98       | 86       | 83      | 17.6        | 0.6       | 28.7    |
| (16-68) | (88-100) | (42-100) | (70-92) | (2.3-134.6) | (0.4-0.9) | (NA-NA) |

Roman-Montes et al.,  
2021\*\* [11]

Observational Proven/putative  
Retrospective 14/144 (10)  
Modified  
AspICU (see

ICU patients with  
COVID-19

the original  
publication for  
details)

|                                                    |               |               |               |               |               |               |               |
|----------------------------------------------------|---------------|---------------|---------------|---------------|---------------|---------------|---------------|
| BALF GM-LFA<br>(2.0 OD) and/or<br>BALF GM (2.0 OD) | 81<br>(48-98) | 63<br>(53-73) | 20<br>(15-27) | 97<br>(89-99) | NA<br>(NA-NA) | NA<br>(NA-NA) | NA<br>(NA-NA) |
| BALF GM-LFA<br>(2.0 OD) and<br>BALF GM (2.0 OD)    | 40<br>(12-74) | 85<br>(77-91) | 22<br>(10-41) | 93<br>(89-96) | NA<br>(NA-NA) | NA<br>(NA-NA) | NA<br>(NA-NA) |

BALF, bronchoalveolar lavage fluid; BDG, (1,3)- $\beta$ -D-glucan; CAPA, coronavirus disease 2019-associated pulmonary aspergillosis; CI, confidence intervals; DOR, diagnostic odds ratio; ECMM, European Confederation of Medical Mycology; EORTC/MSG, European Organization for Research and Treatment of Cancer/Invasive Fungal Infections Cooperative Group and the National Institute of Allergy and Infectious Diseases Mycoses Study Group; GM, galactomannan; ICU, intensive care unit; IPA, invasive pulmonary aspergillosis; ISHAM, International Society for Human and Animal Mycology; LFA, lateral-flow assay; LFD, lateral-flow device; MSGERC, Mycoses Study Group Education and Research Consortium; NA, not available; LR-, negative likelihood ratio; LR+, positive likelihood ratio; NPV, negative predictive value; OD, optical density; PCR, polymerase chain reaction; PPV, positive predictive value; TA, tracheal aspirate.

\* Diagnostic performance parameters and 95% CI calculated for the present systematic review from data included in the original publication.

\*\* Diagnostic performance parameters and 95% CI directly available in the original publication are presented

\*\*\* Diagnostic performance parameters and 95% CI partly available in the original publication and partly calculated for this systematic review from data included in the original publication.

# Type of IA defining the reference positivity (e.g., proven/probable = proven and probable classified as IPA vs. possible and other patients classified as non-IPA, proven/probable/possible = proven and probable and possible classified as IPA vs. other patients classified as non-IPA)

## Number of IPA patients according to the reference positivity (see #)/Number of IPA patients plus non-IPA patients.

**Supplementary table 3. Studies assessing the performance of radiology for the diagnosis of IPA in critically ill patients with existing definitions as reference**

| Study                         | Design                                                | Type of IPA #                                            | Sensitivity % | Specificity %  | PPV %         | NPV %         | LR+               | LR-              | DOR            | Population                                |
|-------------------------------|-------------------------------------------------------|----------------------------------------------------------|---------------|----------------|---------------|---------------|-------------------|------------------|----------------|-------------------------------------------|
| CT sign/s                     | Timeline<br>Reference                                 | IPA prevalence (95% CI)<br>##<br>N/total (%)             | (95% CI)      | (95% CI)       | (95% CI)      | (95% CI)      | (95% CI)          | (95% CI)         | (95% CI)       |                                           |
| Levesque et al.,<br>2019* [4] | Observational<br>Retrospective<br>AspICU criteria [5] | Proven/putative<br>IPA vs.<br>colonization<br>17/60 (28) |               |                |               |               |                   |                  |                | Cirrhotic patients hospitalized<br>in ICU |
| Infiltrates                   |                                                       |                                                          | 65<br>(38-86) | 70<br>(54-83)  | 46<br>(26-67) | 83<br>(67-94) | 2.1<br>(1.2-3.8)  | 0.5<br>(0.3-1.0) | 4.2<br>(NA-NA) |                                           |
| Consolidation                 |                                                       |                                                          | 41<br>(18-67) | 81<br>(67-92)  | 47<br>(21-73) | 78<br>(63-89) | 2.2<br>(1.0-5.2)  | 0.7<br>(0.5-1.1) | 3.1<br>(NA-NA) |                                           |
| Lung nodules                  |                                                       |                                                          | 41<br>(18-67) | 86<br>(72-95)  | 54<br>(25-81) | 79<br>(64-89) | 3.0<br>(1.2-7.5)  | 0.7<br>(0.5-1.0) | 4.3<br>(NA-NA) |                                           |
| Ground-glass opacities        |                                                       |                                                          | 12<br>(1-36)  | 98<br>(88-100) | 67<br>(9-99)  | 74<br>(60-84) | 5.1<br>(0.5-52.2) | 0.9<br>(0.8-1.1) | 5.6<br>(NA-NA) |                                           |

|                                  |               |                 |               |               |                  |                  |                |
|----------------------------------|---------------|-----------------|---------------|---------------|------------------|------------------|----------------|
| Cavitation<br>(Only 1 in non-IA) | 0<br>(0-20)   | 98<br>(88-100)  | 0<br>(0-97)   | 71<br>(58-82) | NA<br>(NA-NA)    | 1.0<br>(1.0-1.1) | NA<br>(NA-NA)  |
| Halo sign<br>(None reported)     | 0<br>(0-20)   | 100<br>(92-100) | NA<br>(NA-NA) | 72<br>(59-83) | NA<br>(NA-NA)    | 1.0<br>(1.0-1.0) | NA<br>(NA-NA)  |
| Pleural effusion                 | 59<br>(33-82) | 60<br>(44-75)   | 37<br>(19-58) | 79<br>(61-91) | 1.5<br>(0.9-2.6) | 0.7<br>(0.4-1.3) | 2.2<br>(NA-NA) |

CI, confidence intervals; CT, computerized tomography; DOR, diagnostic odds ratio; ICU, intensive care unit; IPA, invasive pulmonary aspergillosis; LR-, negative likelihood ratio; LR+, positive likelihood ratio; NA, not available; NPV, negative predictive value; PPV, positive predictive value.

\* Diagnostic performance parameters and 95% CI calculated for the present systematic review from data included in the original publication.

# Type of IPA defining the reference positivity (e.g., proven/probable = proven and probable classified as IPA vs. possible and other patients classified as non-IPA, proven/probable/possible = proven and probable and possible classified as IPA vs. other patients classified as non-IPA)

## Number of IPA patients according to the reference positivity (see #)/Number of IPA patients plus non-IPA patients.

## References

- [1] Janssen NAF, Nyga R, Vanderbeke L, Jacobs C, Ergun M, Buil JB, *et al.* Multinational Observational Cohort Study of COVID-19-Associated Pulmonary Aspergillosis(1). *Emerg Infect Dis.* 2021; 27: 2892-2898.
- [2] Koehler P, Bassetti M, Chakrabarti A, Chen SCA, Colombo AL, Hoenigl M, *et al.* Defining and managing COVID-19-associated pulmonary aspergillosis: the 2020 ECMM/ISHAM consensus criteria for research and clinical guidance. *Lancet Infect Dis.* 2021; 21: e149-e162.
- [3] Lahmer T, Kriescher S, Herner A, Rothe K, Spinner CD, Schneider J, *et al.* Invasive pulmonary aspergillosis in critically ill patients with severe COVID-19 pneumonia: Results from the prospective AspCOVID-19 study. *PLoS One.* 2021; 16: e0238825.

- [4] Levesque E, Ait-Ammar N, Dudau D, Clavieras N, Feray C, Foulet F, *et al.* Invasive pulmonary aspergillosis in cirrhotic patients: analysis of a 10-year clinical experience. *Ann Intensive Care.* 2019; 9: 31.
- [5] Blot SI, Taccone FS, Van den Abeele AM, Bulpa P, Meersseman W, Brusselaers N, *et al.* A clinical algorithm to diagnose invasive pulmonary aspergillosis in critically ill patients. *Am J Respir Crit Care Med.* 2012; 186: 56-64.
- [6] Prattes J, Wauters J, Giacobbe DR, Lagrou K, Hoenigl M, Group E-CS. Diagnosis and treatment of COVID-19 associated pulmonary aspergillosis in critically ill patients: results from a European confederation of medical mycology registry. *Intensive Care Med.* 2021; 47: 1158-1160.
- [7] Yu Y, Zhu C, Shen H, Liu C, Guo R, Gao Y, *et al.* Galactomannan detection in bronchoalveolar lavage fluid corrected by urea dilution for the diagnosis of invasive pulmonary aspergillosis among nonneutropenic patients. *J Thorac Dis.* 2019; 11: 465-476.
- [8] De Pauw B, Walsh TJ, Donnelly JP, Stevens DA, Edwards JE, Calandra T, *et al.* Revised definitions of invasive fungal disease from the European Organization for Research and Treatment of Cancer/Invasive Fungal Infections Cooperative Group and the National Institute of Allergy and Infectious Diseases Mycoses Study Group (EORTC/MSG) Consensus Group. *Clin Infect Dis.* 2008; 46: 1813-1821.
- [9] Jenks JD, Mehta SR, Taplitz R, Aslam S, Reed SL, Hoenigl M. Point-of-care diagnosis of invasive aspergillosis in non-neutropenic patients: Aspergillus Galactomannan Lateral Flow Assay versus Aspergillus-specific Lateral Flow Device test in bronchoalveolar lavage. *Mycoses.* 2019; 62: 230-236.
- [10] Mikulska M, Furfaro E, Dettori S, Giacobbe DR, Magnasco L, Dentone C, *et al.* Aspergillus-PCR in bronchoalveolar lavage - diagnostic accuracy for invasive pulmonary aspergillosis in critically ill patients. *Mycoses.* 2022; 65: 411-418.
- [11] Roman-Montes CM, Martinez-Gamboa A, Diaz-Lomeli P, Cervantes-Sanchez A, Rangel-Cordero A, Sifuentes-Osornio J, *et al.* Accuracy of galactomannan testing on tracheal aspirates in COVID-19-associated pulmonary aspergillosis. *Mycoses.* 2021; 64: 364-371.
- [12] Scharmann U, Verhasselt HL, Kirchhoff L, Buer J, Rath PM, Steinmann J, *et al.* Evaluation of two lateral flow assays in BAL fluids for the detection of invasive pulmonary aspergillosis: A retrospective two-centre study. *Mycoses.* 2020; 63: 1362-1367.
- [13] Donnelly JP, Chen SC, Kauffman CA, Steinbach WJ, Baddley JW, Verweij PE, *et al.* Revision and Update of the Consensus Definitions of Invasive Fungal Disease From the European Organization for Research and Treatment of Cancer and the Mycoses Study Group Education and Research Consortium. *Clin Infect Dis.* 2020; 71: 1367-1376.
- [14] Jenks JD, Prattes J, Frank J, Spiess B, Mehta SR, Boch T, *et al.* Performance of the Bronchoalveolar Lavage Fluid Aspergillus Galactomannan Lateral Flow Assay With Cube Reader for Diagnosis of Invasive Pulmonary Aspergillosis: A Multicenter Cohort Study. *Clin Infect Dis.* 2021; 73: e1737-e1744.
- [15] Giacobbe DR, Prattes J, Wauters J, Dettori S, Signori A, Salmanton-Garcia J, *et al.* Prognostic Impact of Bronchoalveolar Lavage Fluid Galactomannan and Aspergillus Culture Results on Survival in COVID-19 Intensive Care Unit Patients: a Post Hoc Analysis from the European Confederation of Medical Mycology (ECMM) COVID-19-Associated Pulmonary Aspergillosis Study. *J Clin Microbiol.* 2022; 60: e0229821.
